# Venous tone and cardiac function in the South American rattlesnake *Crotalus durissus*: mean circulatory filling pressure during adrenergic stimulation in anaesthetised and fully recovered animals

Marianne Skals<sup>1,2,\*</sup>, Nini Skovgaard<sup>1,2</sup>, Augusto S. Abe<sup>2</sup> and Tobias Wang<sup>1,2</sup>

<sup>1</sup>Department of Zoophysiology, Institute of Biological Science, Aarhus University, Denmark and <sup>2</sup>Departamento de Zoologia, Centro de Aquicultura, UNESP, Rio Claro, São Paulo, Brazil

\*Author for correspondence (e-mail: marianne.skals@biology.au.dk)

Accepted 9 August 2005

## Summary

The effects of adrenergic stimulation on mean circulatory filling pressure (MCFP), central venous pressure ( $P_{CV}$ ) and stroke volume ( $V_s$ ), as well as the effects of altered MCFP through changes of blood volume were investigated in rattlesnakes (*Crotalus durissus*). MCFP is an estimate of the upstream pressure driving blood towards the heart and is determined by blood volume and the activity of the smooth muscle cells in the veins (venous tone). MCFP can be determined as the plateau in  $P_{CV}$  during a total occlusion of blood flow from the heart.

$V_s$  decreased significantly when MCFP was lowered by reducing blood volume in anaesthetised snakes, whereas increased MCFP through infusion of blood (up to  $3 \text{ ml kg}^{-1}$ ) only led to a small rise in  $V_s$ . Thus, it seems that end-diastolic volume is not affected by an elevated MCFP in rattlesnakes. To investigate adrenergic regulation on

venous tone, adrenaline as well as phenylephrine and isoproterenol ( $\alpha$ - and  $\beta$ -adrenergic agonists, respectively) were infused as bolus injections ( $2$  and  $10 \mu\text{g kg}^{-1}$ ). Adrenaline and phenylephrine caused large increases in MCFP and  $P_{CV}$ , whereas isoproterenol decreased both parameters. This was also the case in fully recovered snakes. Therefore, adrenaline affects venous tone through both  $\alpha$ - and  $\beta$ -adrenergic receptors, but the  $\alpha$ -adrenergic receptor dominates at the dosages used in the present study. Injection of the nitric oxide donor SNP caused a significant decrease in  $P_{CV}$  and MCFP. Thus, nitric oxide seems to affect venous tone.

Key words: reptile, *Crotalus durissus*, cardiovascular control, adrenergic regulation, venous tone, mean circulatory filling pressure, venous return.

## Introduction

A primary function of the cardiovascular system is to provide adequate blood flow to secure nutrient and oxygen transport during different behaviours and environmental conditions. It is imperative, therefore, that cardiac output, the product of heart rate and stroke volume, can be altered accordingly. Increased heart rate and stroke volume during exercise or digestion have been documented in a number of reptiles (e.g. Gleeson et al., 1980; Stinner, 1987; Wang et al., 1997, 2001; Secor et al., 2000; Hicks et al., 2000; Farmer and Hicks, 2000; Munns et al., 2004; Clark et al., 2005). Stroke volume is the difference between end-diastolic and end-systolic volumes and is determined by myocardial contractility and cardiac filling. Increased venous return raises end-diastolic volume, which increases contractility and stroke volume *via* the Frank–Starling relationship (Guyton, 1955; Guyton et al., 1955, 1957; Bishop et al., 1964), and it is well established that the venous system plays an important role in determining the rate at which venous blood returns to the heart in mammals (Guyton, 1955; Guyton et al., 1957; Rothe, 1986; Tabrizchi and Pang, 1992; Pang, 2000).

Venous tone, which reflects the tonic contraction of the venous blood vessels, is a determining parameter for venous return and cardiac filling and can be assessed as the central venous pressure ( $P_{CV}$ ) during a brief cessation of blood flow from the heart (Guyton, 1955; Pang, 2001). When cardiac output has stopped, blood will be redistributed between the arterial and venous system and pressures within the entire systemic circulation equalise (Rothe, 1993). This pressure, defined as mean circulatory filling pressure (MCFP) by Guyton et al. (1954), is determined by blood volume and compliance of the entire circulatory system. Importantly, MCFP represents the pressure in the small venules and is the best available estimate of the upstream pressure driving blood towards the heart (Guyton, 1955, 1963; Rothe, 1993). Thus, at a given right atrial pressure, venous return is proportional to MCFP (Tabrizchi and Pang, 1992). An increase in MCFP can be induced by increasing sympathetic tone or by increasing total blood volume. Conversely, a decrease in MCFP can be induced by decreasing sympathetic tone or decreasing total blood

volume (Pang, 2000). By altering blood volume and, thereby, changing MCFP, it is possible to evaluate the effect of a changed venous tone on stroke volume.

Changes in venous return through blood volume alterations markedly affect stroke volume in anaesthetised turtles and that venous return was significantly affected by adrenergic stimulation (S. Warburton, D. C. Jackson, V. T. Bobb and T. Wang, unpublished data). However, it is not known whether this response is mediated by  $\alpha$ - or  $\beta$ -adrenergic receptors. Therefore, the present study was undertaken to investigate the role of these receptors on venous tone in anaesthetised rattlesnakes. Also, the effect of changed venous tone on cardiac filling was investigated. This was accomplished by the use of specific adrenergic agonists and antagonists and by blood infusions and withdrawals. Because anaesthetics may have depressive effects on the cardiovascular system, we also measured  $P_{CV}$  and MCFP during adrenergic stimulation in fully recovered snakes.

## Materials and methods

### *Experimental animals*

Twenty South American rattlesnakes *Crotalus durissus* L., of undetermined sex and a body mass ranging between 170 and 1850 g ( $644 \pm 83$  g; mean  $\pm$  S.E.M.) were obtained from the Butantan Institute in São Paulo and maintained at UNESP, Rio Claro, São Paulo state, Brazil for several weeks before experimentation. The animals had free access to water, whereas food was withheld for at least one week prior to experimentation. All experiments were performed at 25–28°C. The experiments were performed in accordance with guidelines for animal experiments under Universidade Estadual Paulista, Rio Claro (Brazil).

### *Surgery and instrumentation*

#### *Anaesthetised snakes*

Twelve snakes were anaesthetised by an injection of 30 mg kg<sup>-1</sup> pentobarbital (Mebumal, Sygehusapotekerne, Denmark) into the red muscle in the tail. When all reflexes had disappeared, the animals were tracheostomised and artificially ventilated at 4 breaths min<sup>-1</sup> and a tidal volume of 35 ml kg<sup>-1</sup> using a Harvard Apparatus mechanical ventilator (Cambridge, MA, USA).

A 5 cm ventral incision was made to expose the heart and major vessels. To measure systemic arterial blood pressure ( $P_{sys}$ ), the vertebral artery was occlusively cannulated with a PE50 catheter containing heparinised saline (50 IU ml<sup>-1</sup>). To measure central venous blood pressure ( $P_{CV}$ ) a small vein running to the jugular vein was occlusively cannulated with a PE50 or PE90 catheter containing heparinised saline, and the tip of the catheter was advanced into the sinus venosus. Both catheters were connected to Baxter Edward disposable pressure transducers (model PX600; Irvine, CA, USA) and the signals were amplified using an in-house-built preamplifier. Both transducers were positioned at the level of the heart of the animal and calibrated daily against a static water column.

For measurements of systemic and pulmonary blood flows, transit-time ultrasonic blood flow probes (2R or 2S; Transonic System, Inc., Ithaca, NY, USA) were placed around the left aortic arch (LAo) and the pulmonary artery. Flow probes were connected to a Transonic dual-channel blood flow meter (T206). Acoustic gel was infused around the flow probes to enhance the signal.

For measurements of MCFP, a 0.5–1 cm incision was made in the pericardium and a suture (1-0 silk) was placed around the common outflow tract of the heart, which included both aortic arches and the common pulmonary artery. The pericardium was subsequently closed with one or two sutures (4-0 silk).

Signals from the pressure transducers and flow meters were recorded with a Biopac MP100 data acquisition system (Biopac System, Inc., Goleta, CA, USA).

#### *Recovered snakes*

Eight snakes were anaesthetised with CO<sub>2</sub> (Wang et al., 1993) and given a local injection of lidocain ventrally above the heart. In all animals, a 5 cm incision was made ventrally to expose the heart and major vessels, and catheters were inserted to measure  $P_{sys}$  and  $P_{CV}$  as described for the anaesthetised snakes. In four snakes, a 0.5–1 cm incision was made in the pericardium, and a vascular occluder (In Vivo Metric, Healdsburg, CA, USA) was placed around the common outflow tract of the heart. The pericardium was subsequently closed with one or two sutures (4-0 silk). The animals were allowed to recover for 24 h after surgery before measurements started.

### *Experimental protocols*

#### *Anaesthetised snakes*

The 12 anaesthetised animals were divided into two groups with two different experimental protocols. In protocol 1, the adrenergic control of the venous system was investigated by injection of adrenaline and specific  $\alpha$ - and  $\beta$ -agonists (phenylephrine and isoproterenol, respectively). In this series of experiments, blood volume alterations were also made to investigate the effect on  $P_{CV}$ , MCFP and blood flows. The second protocol was designed to characterise the effect of blood volume alterations after  $\alpha$ -adrenergic receptor blockade by injection of phentolamine, an  $\alpha$ -antagonist. The effect of NO on the venous system was also investigated in the second series by injection of the NO donor sodium nitroprusside (SNP).

When all haemodynamic variables had stabilised following surgery, baseline values were recorded. Then, arterial outflows from the heart were occluded by tightening the suture around the common outflow tract, until both  $P_{CV}$  and  $P_{sys}$  had stabilised. This normally occurred within 35 s, and the stable and elevated  $P_{CV}$  during the occlusion was taken to indicate MCFP. Blood pressures and flows returned to baseline values within minutes after releasing the occlusion, and drugs were now administered in the manner described below for the two protocols. In all cases, MCFP was measured when the effect

of the drug on  $P_{\text{sys}}$  was maximal. All haemodynamic variables were allowed to return to baseline values, and MCFP was measured before each subsequent injection. Repeated measurements of MCFP were performed at the beginning of each experiment to show that repeated occlusions of blood flow did not affect haemodynamic variables.

When haemodynamic variables had returned to baseline values after the last injection, MCFP was recorded and blood was infused or withdrawn, as described for the two protocols below, and MCFP was measured immediately after each volume change. Each infusion or withdrawal was completed as quickly as possible. Infused blood came from a donor snake and the order of infusion or withdrawal was randomised. All injections were given through the systemic catheter, and the catheter was flushed with heparinised saline immediately following all injections.

*Protocol 1.* Two dosages of adrenaline ( $2 \mu\text{g kg}^{-1}$  and  $10 \mu\text{g kg}^{-1}$ ), two dosages of phenylephrine ( $2 \mu\text{g kg}^{-1}$  and  $10 \mu\text{g kg}^{-1}$ ) and two dosages of isoproterenol ( $2 \mu\text{g kg}^{-1}$  and  $10 \mu\text{g kg}^{-1}$ ) were injected. Blood was infused in steps of  $9 \pm 0.5$ ,  $16.8 \pm 0.9$  and  $30.5 \pm 1.3 \text{ ml kg}^{-1}$ . Blood was withdrawn in steps of  $8.6 \pm 0.5$ ,  $14.8 \pm 0.5$  and  $23.1 \pm 1.1 \text{ ml kg}^{-1}$ .

*Protocol 2.* Adrenaline ( $10 \mu\text{g kg}^{-1}$ ), two dosages of SNP ( $2.5 \mu\text{g kg}^{-1}$  and  $25 \mu\text{g kg}^{-1}$ ), phentolamine ( $2 \text{ mg kg}^{-1}$ ) and adrenaline ( $2 \mu\text{l kg}^{-1}$ ) were injected. Blood was infused in steps of  $8 \pm 0.4$ ,  $15.7 \pm 0.7$  and  $29.6 \pm 0.4 \text{ ml kg}^{-1}$ . Blood was withdrawn in steps of  $8.4 \pm 0.8$ ,  $16.2 \pm 1.1$  and  $23.2 \pm 0.3 \text{ ml kg}^{-1}$ . Each drug was dissolved in saline (0.9% w/v) and was administered in  $1 \text{ ml kg}^{-1}$  aliquots.

#### Recovered snakes

When the snakes had remained undisturbed for 2 h and exhibited stable haemodynamic variables, baseline values were recorded and adrenergic agonists were administered as described for protocol 1 for anaesthetised snakes. In the four animals with vascular occluders, MCFP was measured during rest and when the effects of the various drugs on  $P_{\text{sys}}$  were maximal by inflating the occluder. Haemodynamic variables normally returned to control values within 60 s after releasing the occlusion. Manipulation of blood volume and administration of SNP were not performed in the recovered snakes.

#### Calculation of cardiac output, heart rate, stroke volume and vascular resistance

Systemic cardiac output ( $\dot{Q}_{\text{sys}}$ ) can be calculated as 3.3 times the flow in the LAo (Galli et al., 2005a,b). Since rattlesnakes only have a single pulmonary artery, pulmonary cardiac output ( $\dot{Q}_{\text{pul}}$ ) can be measured using a single flowprobe. Total cardiac output ( $\dot{Q}_{\text{tot}}$ ) was calculated as  $\dot{Q}_{\text{sys}} + \dot{Q}_{\text{pul}}$ . Heart rate ( $f_{\text{H}}$ ) was derived from the flow trace of the LAo, and total stroke volume ( $V_{\text{S}_{\text{tot}}}$ ; systemic and pulmonary) was calculated as  $\dot{Q}_{\text{tot}}/f_{\text{H}}$ . Systemic vascular resistance ( $R_{\text{sys}}$ ) was calculated from the difference between arterial and central venous blood pressures divided by the systemic cardiac output [ $R_{\text{sys}} = (P_{\text{sys}} - P_{\text{CV}})/\dot{Q}_{\text{sys}}$ ]. Venous resistance ( $R_{\text{ven}}$ ) was calculated from the difference between MCFP and  $P_{\text{CV}}$  divided by systemic cardiac output

[ $R_{\text{ven}} = (\text{MCFP} - P_{\text{CV}})/\dot{Q}_{\text{sys}}$ ; for details on venous resistance see Guyton et al., 1952; Pang, 2000, 2001].

#### Data analysis and statistics

All data are presented as means  $\pm$  S.E.M. Blood pressure and flow recordings were analysed using AcqKnowledge data analysis software (version 3.7.1; Biopac, Goleta, CA, USA). Effects on haemodynamic variables after injections of the various drugs were tested using a paired *t*-test. Differences between the anaesthetised and recovered snakes were tested using a *t*-test. Effects on haemodynamic variables after infusion and withdrawal of blood within each protocol were tested using a one-way analysis of variance (ANOVA) for repeated measurements, followed by a Dunnett's *post hoc* test to identify values that were significantly different from control values. Differences in MCFP during blood volume alterations between the two protocols were tested using a two-way ANOVA. A limit for significance of  $P < 0.05$  was applied.

## Results

### Anaesthetised snakes

Examples of the measurements of MCFP before and immediately after injection of the high dosages of the adrenergic agonists are shown in Fig. 1. Occlusion of the common outflow tract from the heart, shown by the grey bars, caused a progressive decline of  $P_{\text{sys}}$  and a rise in  $P_{\text{CV}}$ . The stable  $P_{\text{CV}}$  during occlusion was taken as MCFP. Adrenaline delayed the rate at which  $P_{\text{sys}}$  declined during occlusion, but  $P_{\text{CV}}$  stabilised within 30 s in all anaesthetised snakes.

### Effects of adrenergic agonists

Mean haemodynamic parameters before and after adrenergic stimulation are shown in Figs 2, 3, where black bars represent control values, and grey bars represent values after injection of the agonists. Both dosages of adrenaline caused a marked increase in  $P_{\text{sys}}$ ,  $P_{\text{CV}}$  and MCFP, reflecting a constriction of the systemic vasculature. This constriction was manifested as a rise in  $R_{\text{sys}}$ , but adrenaline also increased  $R_{\text{ven}}$ , which indicates a marked constriction of the venous system. Heart rate tended to increase, although not significantly, after infusion of adrenaline. Adrenaline also caused an increase in  $\dot{Q}_{\text{pul}}$  and a decrease in  $\dot{Q}_{\text{sys}}$ , causing a rise of  $\dot{Q}_{\text{pul}}/\dot{Q}_{\text{sys}}$ , which reflects an increased L-R cardiac shunt (recirculation of blood within the pulmonary circulation). All changes in haemodynamic variables due to adrenaline were dose dependent, being more pronounced at the highest dose.

The  $\alpha$ -agonist phenylephrine generally elicited similar responses on the systemic vasculature to those of adrenaline but did not affect  $f_{\text{H}}$  and  $\dot{Q}_{\text{pul}}$ . Thus, phenylephrine elicited a significant rise in  $P_{\text{CV}}$  and MCFP, reflecting an increased venous tone. The high dosages of phenylephrine caused a significant increase in  $P_{\text{sys}}$ ,  $R_{\text{sys}}$  and  $R_{\text{ven}}$  and a significant decrease in  $\dot{Q}_{\text{sys}}$  as the systemic vasculature constricted.

Injection of the  $\beta$ -agonist isoproterenol caused significant decreases in  $P_{\text{sys}}$ ,  $P_{\text{CV}}$ , MCFP,  $R_{\text{sys}}$  and  $R_{\text{ven}}$ . Thus,

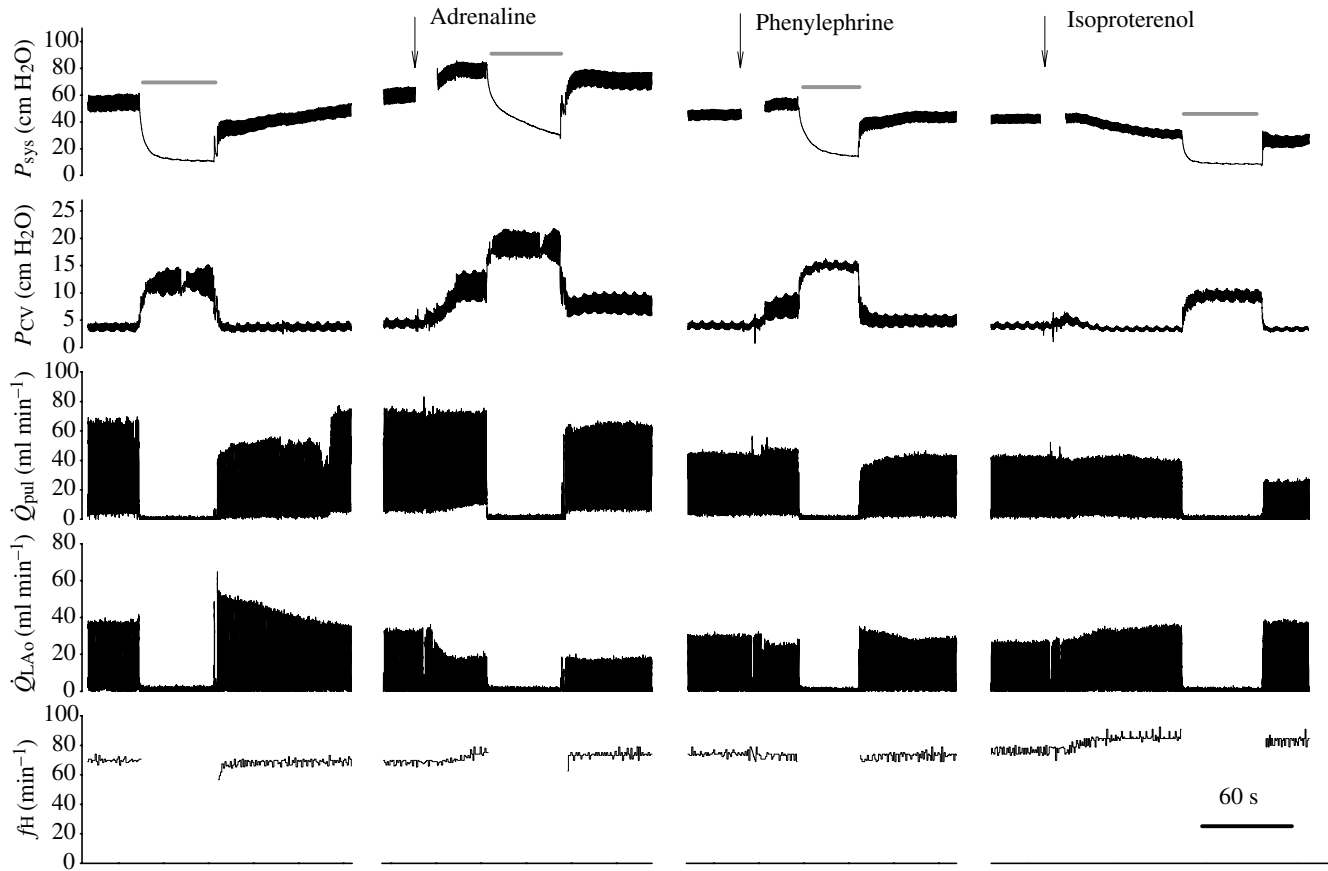

Fig. 1. Haemodynamic parameters in an anaesthetised South American rattlesnake *Crotalus durissus* (525 g), before and after injection of adrenaline ( $10 \mu\text{g kg}^{-1}$ ), phenylephrine ( $10 \mu\text{g kg}^{-1}$ ) and isoproterenol ( $10 \mu\text{g kg}^{-1}$ ). Arrows indicate injection of the various drugs. Grey bars indicate occlusion of blood flow from the heart to measure mean circulatory filling pressure (MCFP).  $P_{\text{sys}}$ , systemic blood pressure;  $P_{\text{CV}}$ , central venous pressure;  $\dot{Q}_{\text{pul}}$ , pulmonary cardiac output;  $\dot{Q}_{\text{LAo}}$ , left aortic cardiac output;  $f_{\text{H}}$ , heart rate. (1 cm H<sub>2</sub>O=0.098 kPa.)

Table 1. The effects of injected SNP in anaesthetised South American rattlesnakes *Crotalus durissus*

|                  | $P_{\text{CV}}$<br>(cm H <sub>2</sub> O) | $P_{\text{sys}}$<br>(cm H <sub>2</sub> O) | $f_{\text{H}}$<br>(min <sup>-1</sup> ) | MCFP<br>(cm H <sub>2</sub> O) | $\dot{Q}_{\text{LAo}}$<br>(ml kg <sup>-1</sup> min <sup>-1</sup> ) | $\dot{Q}_{\text{pul}}$<br>(ml kg <sup>-1</sup> min <sup>-1</sup> ) | $\dot{Q}_{\text{sys}}$<br>(ml kg <sup>-1</sup> min <sup>-1</sup> ) |
|------------------|------------------------------------------|-------------------------------------------|----------------------------------------|-------------------------------|--------------------------------------------------------------------|--------------------------------------------------------------------|--------------------------------------------------------------------|
| Baseline         | 3.1±0.22                                 | 40.8±3.49                                 | 49.2±1.86                              | 8.4±1.15                      | 32.3±10.5                                                          | 57.1±22.1                                                          | 106.5±34.8                                                         |
| SNP <sup>1</sup> | 2.8±0.18*                                | 20.3±3.20*                                | 51.7±4.35                              | 6.6±0.94                      | 33.1±9.24                                                          | 23.1±5.95                                                          | 109.3±30.5                                                         |
| Baseline         | 3.2±0.28                                 | 41.6±4.84                                 | 50.3±3.49                              | 8.64±1.08                     | 30.2±13.9                                                          | 61.3±28.6                                                          | 99.6±46.2                                                          |
| SNP <sup>2</sup> | 2.7±0.21*                                | 19.9±1.96*                                | 55.4±5.37                              | 5.5±0.85*                     | 30.7±6.97                                                          | 24.9±8.1                                                           | 101.4±23.0                                                         |

  

|                  | $\dot{Q}_{\text{tot}}$<br>(ml kg <sup>-1</sup> min <sup>-1</sup> ) | $V_{\text{Ssys}}$<br>(ml kg <sup>-1</sup> ) | $V_{\text{Spul}}$<br>(ml kg <sup>-1</sup> ) | $V_{\text{Stot}}$<br>(ml kg <sup>-1</sup> ) | $R_{\text{sys}}$<br>(cm H <sub>2</sub> O ml <sup>-1</sup> min <sup>-1</sup> kg <sup>-1</sup> ) | $R_{\text{ven}}$<br>(cm H <sub>2</sub> O ml <sup>-1</sup> min <sup>-1</sup> kg <sup>-1</sup> ) | $\dot{Q}_{\text{pul}}/\dot{Q}_{\text{sys}}$ |
|------------------|--------------------------------------------------------------------|---------------------------------------------|---------------------------------------------|---------------------------------------------|------------------------------------------------------------------------------------------------|------------------------------------------------------------------------------------------------|---------------------------------------------|
| Baseline         | 159.3±35.4                                                         | 2.16±0.71                                   | 1.06±0.36                                   | 3.20±0.70                                   | 0.58±0.19                                                                                      | 0.07±0.02                                                                                      | 0.77±0.23                                   |
| SNP <sup>1</sup> | 134.9±35.2                                                         | 2.02±0.58                                   | 0.49±0.18                                   | 2.52±0.71*                                  | 0.25±0.09*                                                                                     | 0.04±0.01*                                                                                     | 0.29±0.08                                   |
| Baseline         | 145.3±40.9                                                         | 1.97±0.83                                   | 0.92±0.3                                    | 2.88±0.77                                   | 1.03±0.54                                                                                      | 0.13±0.06                                                                                      | 1.31±0.72                                   |
| SNP <sup>2</sup> | 122.9±25.0                                                         | 1.89±0.43                                   | 0.42±0.13                                   | 2.29±0.51                                   | 0.25±0.08*                                                                                     | 0.04±0.01*                                                                                     | 0.28±0.07                                   |

Values are means ± S.E.M. ( $N=5$ ). Asterisks denote a significant difference relative to the baseline value. SNP<sup>1</sup> ( $2.5 \mu\text{g kg}^{-1}$ ), SNP<sup>2</sup> ( $25 \mu\text{g kg}^{-1}$ ).

$P_{\text{CV}}$ , central venous blood pressure;  $P_{\text{sys}}$ , mean systemic blood pressure;  $f_{\text{H}}$ , heart rate; MCFP, mean circulatory filling pressure;  $\dot{Q}_{\text{LAo}}$ , left aortic arch cardiac output;  $\dot{Q}_{\text{pul}}$ , pulmonary cardiac output;  $\dot{Q}_{\text{sys}}$ , systemic cardiac output;  $\dot{Q}_{\text{tot}}$ , total cardiac output;  $V_{\text{Ssys}}$ , systemic stroke volume;  $V_{\text{Spul}}$ , pulmonary stroke volume;  $V_{\text{Stot}}$ , total stroke volume;  $R_{\text{sys}}$ , systemic resistance;  $R_{\text{ven}}$ , venous resistance;  $\dot{Q}_{\text{pul}}/\dot{Q}_{\text{sys}}$ , ratio of pulmonary cardiac output to systemic cardiac output. (1 cm H<sub>2</sub>O=0.098 kPa.)

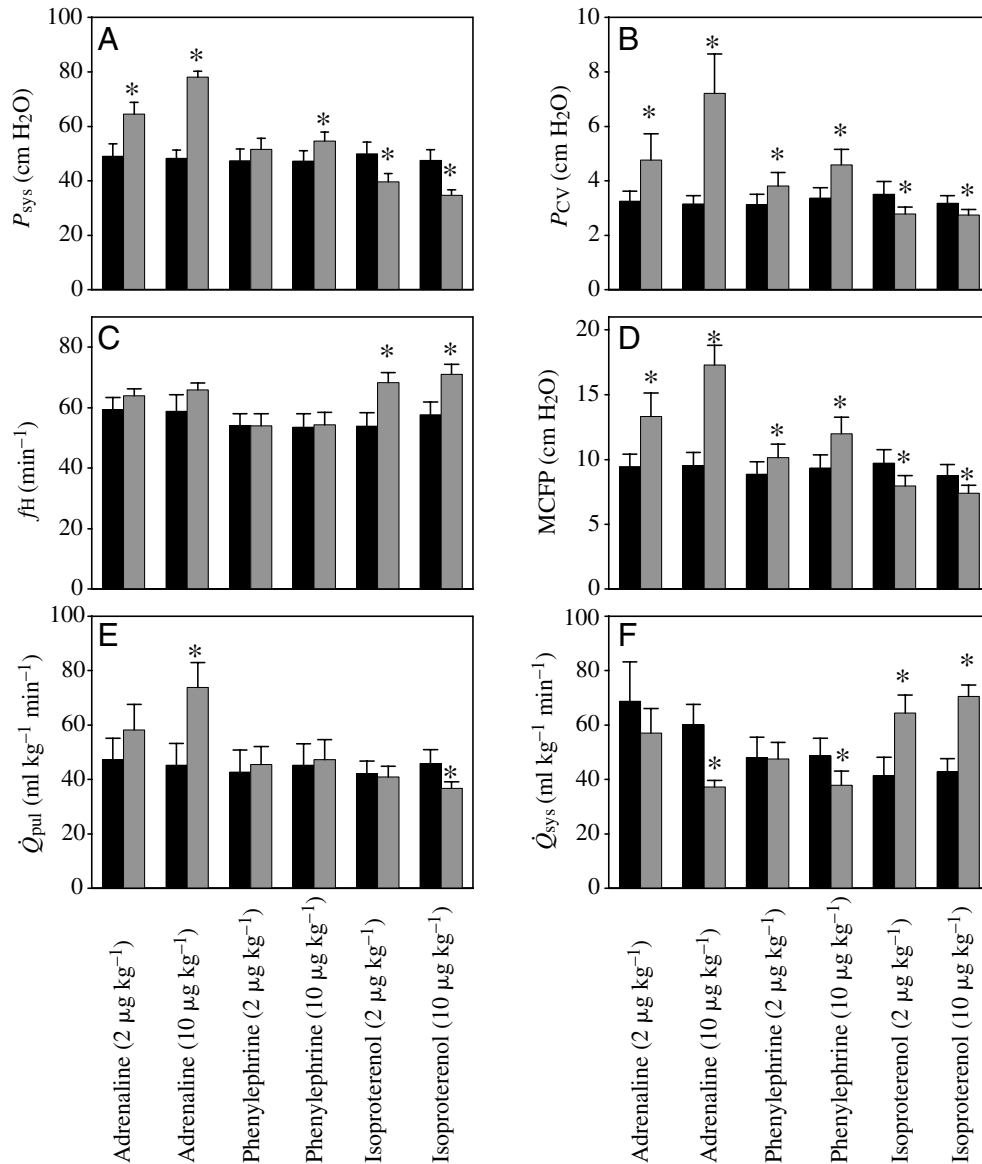

Fig. 2. Effects of bolus injections (2 and 10  $\mu\text{g kg}^{-1}$ ) of adrenaline, phenylephrine and isoproterenol on haemodynamic variables in anaesthetised South American rattlesnakes *Crotalus durissus*: (A)  $P_{\text{sys}}$ , mean systemic blood pressure; (B)  $P_{\text{CV}}$ , central venous blood pressure; (C)  $f_{\text{H}}$ , heart rate; (D) MCFP, mean circulatory filling pressure; (E)  $\dot{Q}_{\text{pul}}$ , pulmonary cardiac output; (F)  $\dot{Q}_{\text{sys}}$ , systemic cardiac output. Black bars represent control values. Grey bars represent values after injection of the various adrenergic agonists. Values are means  $\pm$  S.E.M. ( $N=6$ ). Asterisks indicate a significant difference relative to control values. (1 cm H<sub>2</sub>O=0.098 kPa.)

isoproterenol seemed to cause an overall relaxation of both the arterial system and the venous system. Furthermore, isoproterenol caused significant increases in  $f_{\text{H}}$  and systemic blood flow and a decrease in pulmonary blood flow. As a consequence,  $\dot{Q}_{\text{pul}}/\dot{Q}_{\text{sys}}$  decreased.

#### Effects of nitric oxide

The effects of injecting the NO donor SNP are shown in Table 1. SNP caused a significant decrease in  $P_{\text{sys}}$ ,  $P_{\text{CV}}$ , MCFP and a decrease in both  $R_{\text{sys}}$  and  $R_{\text{ven}}$ , reflecting an overall relaxation of the vasculature. Regarding blood flows, SNP caused no changes in  $\dot{Q}_{\text{sys}}$  but did affect  $\dot{Q}_{\text{pul}}$ , resulting in a decrease in  $\dot{Q}_{\text{tot}}$  and  $V_{\text{Stot}}$ .

#### MCFP at blood volume alterations

The effects of manipulating blood volume by withdrawal and infusion of blood are shown in Figs 4–6 for untreated

animals (black symbols) and the group of snakes where the  $\alpha$ -adrenergic receptors had been blocked by phentolamine (grey symbols). Before treatment with phentolamine, both groups responded similarly to adrenaline (Table 2; Figs 2, 3), and the efficacy of the  $\alpha$ -adrenergic blockade was evident from the lack of vasoconstriction following infusion of adrenaline (Table 2).

As shown in Fig. 4, MCFP increased significantly for both the untreated and the  $\alpha$ -blocked snakes when blood volume was elevated by blood infusion and tended to decrease when blood was withdrawn. This presentation of MCFP as a function of blood volume represents ‘capacitance curves’, and the inverse slope of the capacitance curve represents the overall compliance ( $C$ ) of the vasculature, under the assumption that there is no transcapillary fluid movement during manipulation of blood volume (Samar and Coleman, 1978). In the present study, compliance was estimated to be  $3.3 \pm 0.3$  and

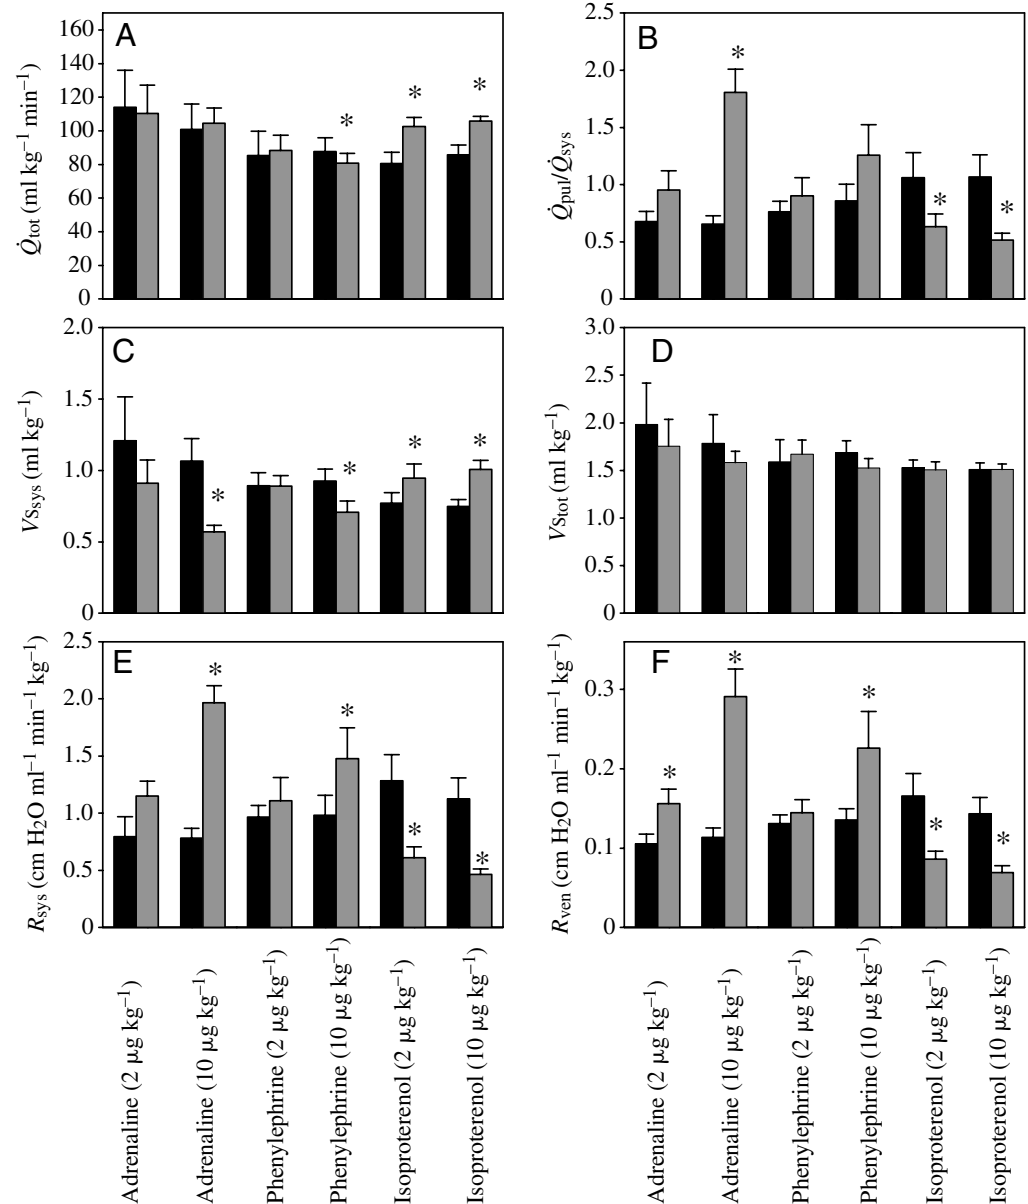

Fig. 3. Effects of bolus injections (2 and 10  $\mu\text{g kg}^{-1}$ ) of adrenaline, phenylephrine and isoproterenol on haemodynamic variables in anaesthetised South American rattlesnakes *Crotalus durissus*: (A)  $\dot{Q}_{tot}$ , total cardiac output; (B)  $\dot{Q}_{pul}/\dot{Q}_{sys}$ , ratio of pulmonary cardiac output to systemic cardiac output; (C)  $V_{Ssys}$ , systemic stroke volume; (D)  $V_{Stot}$ , total stroke volume; (E)  $R_{sys}$ , systemic resistance; (F)  $R_{ven}$ , venous resistance. Black bars represent control values. Grey bars represent values after injection of the various adrenergic agonists. Values are means  $\pm$  S.E.M. ( $N=6$ ). Asterisks indicate a significant difference relative to control values. (1 cm H<sub>2</sub>O=0.098 kPa.)

$3.9 \pm 0.7$  ml kg<sup>-1</sup> cmH<sub>2</sub>O<sup>-1</sup> for untreated and  $\alpha$ -blocked snakes, respectively. Unstressed blood volume (USBV), the blood volume at zero distending pressure, can also be estimated from the capacitance curves by extrapolating the curve to a MCFP value of zero (Samar and Coleman, 1978; Rothe, 1993; Fig. 4). We did not measure total blood volume, but using the value of 54 ml kg<sup>-1</sup> measured on the closely related *Crotalus viridis* (Smits and Lillywhite, 1984), we estimate USBV to be  $20.7 \pm 1.8$  and  $18.3 \pm 7.1$  ml kg<sup>-1</sup> for the untreated and  $\alpha$ -blocked snakes, respectively (Fig. 4). There were no significant differences between  $C$  and USBV between the two groups; i.e. untreated and  $\alpha$ -blocked snakes.

Figs 5, 6 show the effect of changing blood volume on the various haemodynamic parameters in untreated snakes (black symbols), where the haemodynamic variables are presented as a function of MCFP at each blood volume. In these snakes,  $P_{sys}$ ,

$P_{CV}$ ,  $\dot{Q}_{pul}$ ,  $\dot{Q}_{sys}$ ,  $\dot{Q}_{tot}$ ,  $V_{Spul}$ ,  $V_{Ssys}$  and  $V_{Stot}$  were significantly affected by MCFP. Increased MCFP by volume loading did not lead to a significant rise in  $\dot{Q}$  or  $V_s$ , but a lowering of MCFP by blood withdrawal generally resulted in a decline of  $\dot{Q}$  and  $V_s$ . Blood volume did not affect  $f_H$  and  $R_{ven}$ , but there was tendency of  $R_{sys}$  to increase in response to low blood volume.

The effects of phentolamine at normal blood volume are listed in Table 2, and the relationships between haemodynamic variables and MCFP, obtained after manipulation of blood volume, are also included in Figs 5, 6 (grey symbols). The group of snakes that received  $\alpha$ -blockade had higher  $\dot{Q}_{sys}$  and  $V_{Ssys}$  than the group of untreated snakes; as a consequence, these snakes had significantly higher  $\dot{Q}_{pul}/\dot{Q}_{sys}$  than untreated snakes. At normal blood volume, the snakes responded to phentolamine by reductions in  $P_{sys}$  and  $R_{sys}$ , but these changes were not statistically significant (Table 2). During the

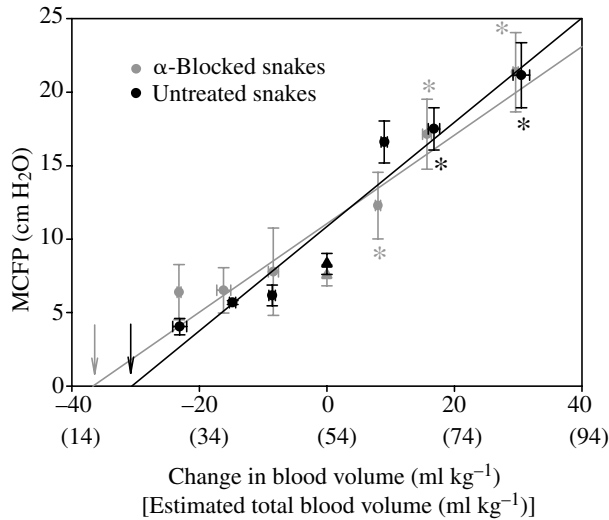

Fig. 4. Capacitance curves. Mean circulatory filling pressure (MCFP) as a function of a change in blood volume ( $\text{ml kg}^{-1}$ ) in anaesthetised South American rattlesnakes *Crotalus durissus*.  $0 \text{ ml kg}^{-1}$  represents normal blood volume and the control value. Values in parentheses represent blood volume, assuming this species to have a blood volume of  $54 \text{ ml kg}^{-1}$ . Black symbols represent the untreated snakes and grey symbols represent the  $\alpha$ -blocked snakes. Triangles indicate control values at normal blood volume. A weighted linear regression curve has been fitted to each group of snakes, where the black curve ( $y=0.306x+10.17$ ) and the grey curve ( $y=0.256x+9.14$ ) represent the untreated and the  $\alpha$ -blocked animals, respectively. Arrows indicate unstressed blood volumes. Values are means  $\pm$  S.E.M. ( $N=6$ ). Asterisks indicate a significant difference relative to control values. ( $1 \text{ cm H}_2\text{O}=0.098 \text{ kPa}$ .)

subsequent manipulation of blood volume, the phentolamine-treated snakes responded qualitatively similarly to the untreated snakes, but  $\dot{Q}_{\text{sys}}$  and  $\dot{Q}_{\text{tot}}$  as well as  $V_{\text{Ssys}}$  and  $V_{\text{Stot}}$  remained elevated at all MCFPs. As a major difference, the phentolamine-treated snakes had significantly lower  $R_{\text{sys}}$  and  $R_{\text{ven}}$ , and there was no compensatory increase in  $R_{\text{sys}}$  during volume depletion of the  $\alpha$ -blocked snakes.

Recovered snakes

Measurements of MCFP before and after injections of adrenergic agonists from one animal are shown in Fig. 7. The three other animals with vascular occluders responded similarly. Blood pressures and  $fH$  for the two groups of snakes with and without vascular occluders are illustrated in Fig. 8, where the left hand-panel (Fig. 8A–D) shows data from snakes with a vascular occluder, whereas results from the animals without an occluder are shown in the right-hand panel (Fig. 8E–G). Baseline values for heart rates and blood pressures were similar in the two groups, and they responded similarly to adrenergic agonists, although the group without a vascular occluder generally showed more pronounced responses. As in the anaesthetised snakes, adrenaline caused a marked rise in  $P_{\text{sys}}$ ,  $P_{\text{CV}}$  and MCFP, which was mirrored after injection of phenylephrine, while isoproterenol caused a decrease in  $P_{\text{sys}}$  and a rise in  $fH$ .

Discussion

The present study is the first to report on MCFP in fully recovered reptiles and the first study to discern the roles of  $\alpha$ -

Table 2. The effects of injected adrenaline and phentolamine in anaesthetised South American rattlesnakes, *Crotalus durissus*

|                         | $P_{\text{CV}}$<br>( $\text{cm H}_2\text{O}$ ) | $P_{\text{sys}}$<br>( $\text{cm H}_2\text{O}$ ) | $fH$<br>( $\text{min}^{-1}$ ) | MCFP<br>( $\text{cm H}_2\text{O}$ ) | $\dot{Q}_{\text{LAo}}$<br>( $\text{ml kg}^{-1} \text{ min}^{-1}$ ) | $\dot{Q}_{\text{pul}}$<br>( $\text{ml kg}^{-1} \text{ min}^{-1}$ ) | $\dot{Q}_{\text{sys}}$<br>( $\text{ml kg}^{-1} \text{ min}^{-1}$ ) |
|-------------------------|------------------------------------------------|-------------------------------------------------|-------------------------------|-------------------------------------|--------------------------------------------------------------------|--------------------------------------------------------------------|--------------------------------------------------------------------|
| Baseline                | $3.0 \pm 0.4$                                  | $44.9 \pm 4.8$                                  | $50.9 \pm 2.8$                | $7.8 \pm 1.7$                       | $38.8 \pm 12.5$                                                    | $63.8 \pm 20.1$                                                    | $128.2 \pm 41.2$                                                   |
| Adrenaline <sup>1</sup> | $9.4 \pm 1.3^*$                                | $80.7 \pm 4.9^*$                                | $66.0 \pm 3.8^*$              | $16.9 \pm 1.3^*$                    | $28.6 \pm 9.9$                                                     | $89.0 \pm 33.6$                                                    | $94.4 \pm 32.8$                                                    |
| Baseline                | $3.1 \pm 0.2$                                  | $36.5 \pm 4.1$                                  | $48.4 \pm 5.7$                | $7.7 \pm 1.2$                       | $56.3 \pm 25.0$                                                    | $26.7 \pm 11.4$                                                    | $185.6 \pm 82.5$                                                   |
| Phentolamine            | $3.1 \pm 0.4$                                  | $27.5 \pm 3.3$                                  | $63.8 \pm 2.8$                |                                     | $42.0 \pm 11.8$                                                    | $38.3 \pm 9.4$                                                     | $138.7 \pm 39.0$                                                   |
| Baseline                | $3.1 \pm 0.4$                                  | $27.5 \pm 3.3$                                  | $63.8 \pm 2.8$                |                                     | $42.0 \pm 11.8$                                                    | $38.3 \pm 9.4$                                                     | $138.7 \pm 39.0$                                                   |
| Adrenaline <sup>2</sup> | $3.7 \pm 0.4$                                  | $29.4 \pm 3.5$                                  | $66.1 \pm 3.3$                |                                     | $62.7 \pm 12.1$                                                    | $48.4 \pm 9.8$                                                     | $207.1 \pm 39.8$                                                   |
| Baseline                | $3.3 \pm 0.3$                                  | $25.6 \pm 3.5$                                  | $64.5 \pm 2.0$                | $7.1 \pm 1.0$                       | $48.0 \pm 14.1$                                                    | $33.8 \pm 10.7$                                                    | $158.3 \pm 46.4$                                                   |

  

|                         | $\dot{Q}_{\text{tot}}$<br>( $\text{ml kg}^{-1} \text{ min}^{-1}$ ) | $V_{\text{Ssys}}$<br>( $\text{ml kg}^{-1}$ ) | $V_{\text{Spul}}$<br>( $\text{ml kg}^{-1}$ ) | $V_{\text{Stot}}$<br>( $\text{ml kg}^{-1}$ ) | $R_{\text{sys}}$<br>( $\text{cm H}_2\text{O ml}^{-1} \text{ min}^{-1} \text{ kg}^{-1}$ ) | $R_{\text{ven}}$<br>( $\text{cm H}_2\text{O ml}^{-1} \text{ min}^{-1} \text{ kg}^{-1}$ ) | $\dot{Q}_{\text{pul}}/\dot{Q}_{\text{sys}}$ |
|-------------------------|--------------------------------------------------------------------|----------------------------------------------|----------------------------------------------|----------------------------------------------|------------------------------------------------------------------------------------------|------------------------------------------------------------------------------------------|---------------------------------------------|
| Baseline                | $192.0 \pm 38.9$                                                   | $2.4 \pm 0.7$                                | $1.3 \pm 0.4$                                | $3.7 \pm 0.7$                                | $0.53 \pm 0.18$                                                                          | $0.06 \pm 0.02$                                                                          | $2.6 \pm 0.8$                               |
| Adrenaline <sup>1</sup> | $183.0 \pm 32.5$                                                   | $1.5 \pm 0.5$                                | $1.4 \pm 0.5$                                | $2.8 \pm 0.6$                                | $1.08 \pm 0.26^*$                                                                        | $0.15 \pm 0.05^*$                                                                        | $5.1 \pm 1.7^*$                             |
| Baseline                | $212.4 \pm 74.8$                                                   | $3.5 \pm 1.3$                                | $0.6 \pm 0.3$                                | $4.1 \pm 1.1$                                | $0.45 \pm 0.19$                                                                          | $0.05 \pm 0.02$                                                                          | $1.6 \pm 0.8$                               |
| Phentolamine            | $176.9 \pm 45.5$                                                   | $2.1 \pm 0.6$                                | $0.6 \pm 0.1$                                | $2.7 \pm 0.7$                                | $0.17 \pm 0.06$                                                                          | $0.08 \pm 0.03$                                                                          | $1.2 \pm 0.3$                               |
| Baseline                | $176.9 \pm 45.5$                                                   | $2.1 \pm 0.6$                                | $0.6 \pm 0.1$                                | $2.7 \pm 0.7$                                | $0.17 \pm 0.06$                                                                          | $0.08 \pm 0.03$                                                                          | $1.2 \pm 0.3$                               |
| Adrenaline <sup>2</sup> | $255.5 \pm 40.6$                                                   | $3.1 \pm 0.6$                                | $0.7 \pm 0.2$                                | $3.9 \pm 0.6$                                | $0.15 \pm 0.04$                                                                          |                                                                                          | $0.9 \pm 0.4$                               |
| Baseline                | $192.1 \pm 53.0$                                                   | $2.4 \pm 0.7$                                | $0.5 \pm 0.2$                                | $3.0 \pm 0.8$                                | $0.25 \pm 0.10$                                                                          | $0.03 \pm 0.01$                                                                          | $0.9 \pm 0.3$                               |

Values are means  $\pm$  S.E.M. ( $N=5$ ). Asterisks denote a significant difference relative to the baseline value. Adrenaline<sup>1</sup>,  $10 \mu\text{g kg}^{-1}$ ; adrenaline<sup>2</sup>,  $2 \mu\text{g kg}^{-1}$ ; phentolamine,  $2 \text{ mg kg}^{-1}$ .

See Table 1 for definitions of abbreviations.

or  $\beta$ -receptors on venous tone in reptiles. In addition, MCFP was manipulated by changing blood volume to assess how venous return affects stroke volume.

The haemodynamic variables of the anaesthetised rattlesnakes in our study were similar to those reported previously on the same species using pentobarbital as anaesthetic (Galli et al., 2005a,b). Anaesthetised snakes had higher  $P_{\text{sys}}$  and  $f_{\text{H}}$  than fully recovered snakes, and it is likely that anaesthesia lowers parasympathetic tone and increases sympathetic tone as in turtles (Crossley et al., 1998). However,  $P_{\text{CV}}$  and MCFP were not significantly affected by anaesthesia in rattlesnakes.

#### Measurements of MCFP

In rattlesnakes,  $P_{\text{CV}}$  and  $P_{\text{sys}}$  usually stabilised at equal

values within 35 s after occlusion, and  $P_{\text{CV}}$  at that time was taken to indicate MCFP. It is possible that vascular tone changed shortly upon occlusion in response to the lowered arterial blood pressure and ischemia of vascular beds, and such compensatory mechanisms could affect our estimation of MCFP (Guyton, 1963; Pang, 2001). Compensatory mechanisms are rapidly activated in mammals, which is evident from a rise in  $P_{\text{CV}}$  after approximately 10 s of occlusion (Guyton, 1963; Rothe and Dress, 1976; Hainsworth, 1986), and trout also appear to have fast compensatory responses (Sandblom and Axelsson, 2005). In our study, however, there was no rise in  $P_{\text{CV}}$  within 35 s of occlusion, indicating that compensatory reflexes were not yet activated and that our assessment of MCFP is valid.

After infusion of adrenaline and phenylephrine, the marked

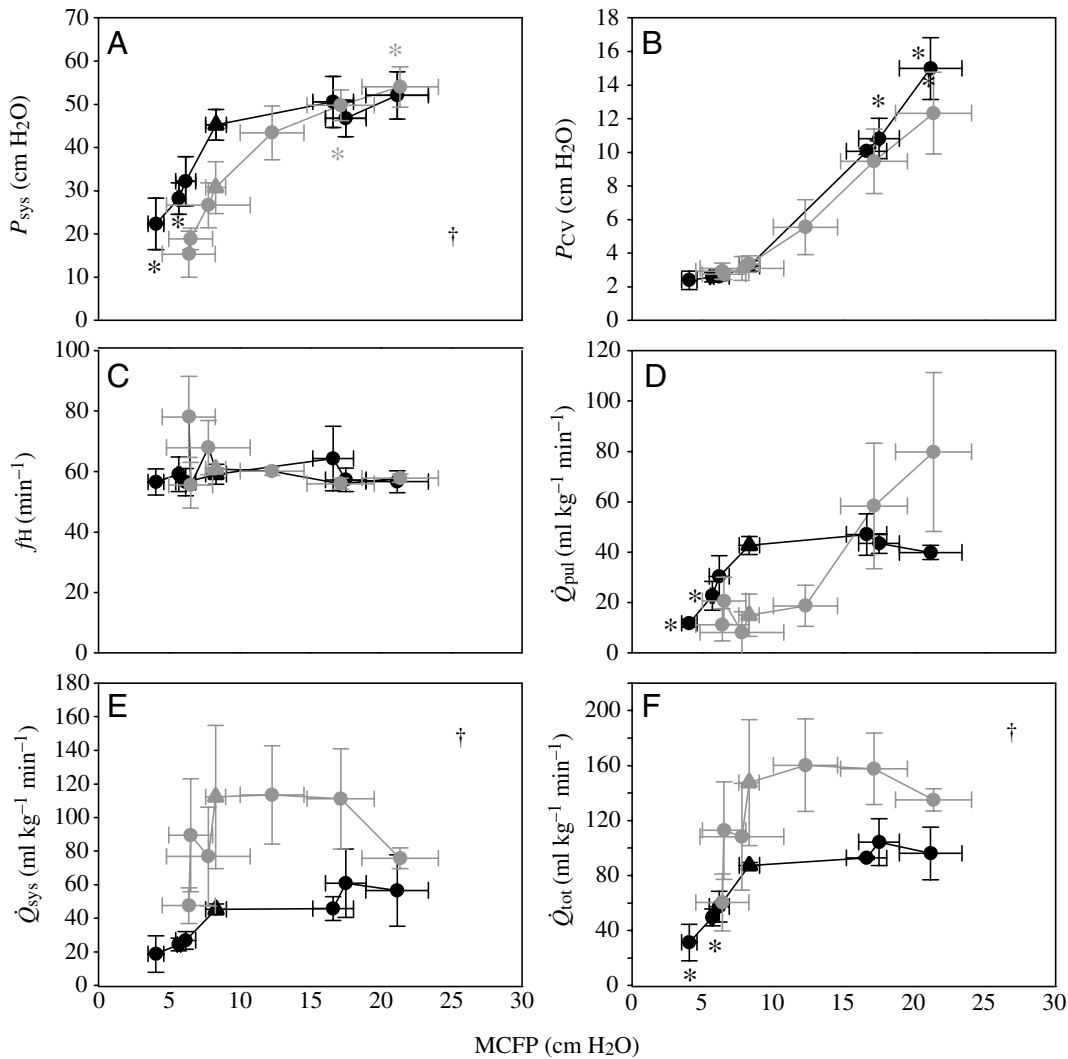

Fig. 5. Haemodynamic effects of blood volume alterations in South American rattlesnakes *Crotalus durissus*, as a function of mean circulatory filling pressure (MCFP) measured at each blood volume change. (A)  $P_{\text{sys}}$ , mean systemic blood pressure; (B)  $P_{\text{CV}}$ , central venous pressure; (C)  $f_{\text{H}}$ , heart rate; (D)  $\dot{Q}_{\text{pul}}$ , pulmonary cardiac output; (E)  $\dot{Q}_{\text{sys}}$ , systemic cardiac output; (F)  $\dot{Q}_{\text{tot}}$ , total cardiac output. Black symbols represent the untreated group and grey symbols represent the  $\alpha$ -blocked group. Triangles indicate control values at normal blood volume. Values are means  $\pm$  S.E.M. ( $N=6$  for each group). \* indicates a significant difference relative to control values. † indicates a significant difference between the two groups of snakes. (1 cm H<sub>2</sub>O=0.098 kPa.)



rise in resistance often delayed the equilibration between systemic and venous pressures. In these instances,  $P_{CV}$  after no more than 40 s of occlusion was taken to indicate MCFP, although  $P_{CV}$  and  $P_{sys}$  were not equal. However, given that the venous compliance is approximately six times higher than the arterial compliance in this species (estimated from the decline in  $P_{sys}$  relative to the rise in  $P_{CV}$  during occlusion;  $P_{sys}$  declined from  $49.0 \pm 4.6$  to  $11.0 \pm 1.1$  cm H<sub>2</sub>O (1 cm H<sub>2</sub>O=0.098 kPa), while  $P_{CV}$  increased from  $3.3 \pm 0.4$  to  $9.5 \pm 1.0$  cm H<sub>2</sub>O), the lack of complete equilibration would only have minor effects on the estimated MCFP.

It was necessary to open the pericardium to place the occluder for measurement of MCFP. This could influence haemodynamic variables, so we determined  $P_{sys}$ ,  $P_{CV}$  and  $\dot{V}_H$  in

a group of recovered snakes without a vascular occluder and an intact pericardium. At rest and when undisturbed, both groups had similar blood pressures and heart rates, but, after injection of the various adrenergic drugs, the group without a vascular occluder exhibited larger blood pressure responses.

*Adrenergic effects on blood pressures*

Adrenaline increased  $P_{sys}$ ,  $P_{CV}$  and MCFP in both anaesthetised and recovered snakes, reflecting a marked rise in overall vascular tone, and elicited a small tachycardia. Similar responses have been reported in recovered rats and fish (Trippodo, 1981; Zhang et al., 1998). The  $\alpha$ -agonist phenylephrine elicited similar, albeit less pronounced, responses without affecting  $\dot{V}_H$ . In recovered dogs,

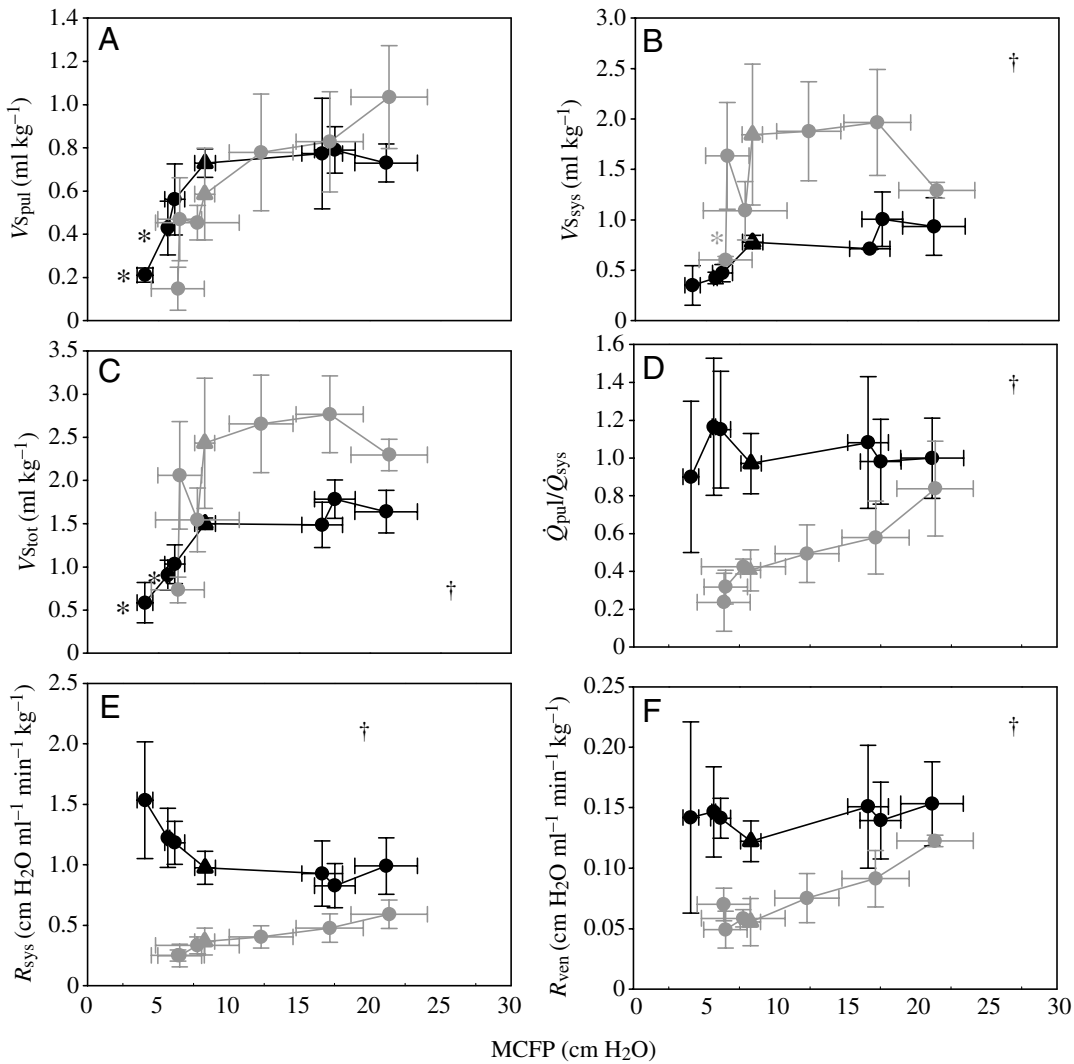

Fig. 6. Haemodynamic effects of blood volume alterations in South American rattlesnakes *Crotalus durissus*, as a function of mean circulatory filling pressure (MCFP) measured at each blood volume change. (A)  $V_{sput}$ , pulmonary stroke volume; (B)  $V_{sys}$ , systemic stroke volume; (C)  $V_{stot}$ , total stroke volume; (D)  $\dot{Q}_{pul}/\dot{Q}_{sys}$ , ratio of pulmonary cardiac output to systemic cardiac output; (E)  $R_{sys}$ , systemic resistance; (F)  $R_{ven}$ , venous resistance. Black symbols represent the untreated group and grey symbols represent the  $\alpha$ -blocked group. Triangles indicate control values at normal blood volume. Values are means  $\pm$  S.E.M. ( $N=6$  for each group). \* indicates a significant difference relative to control value. † indicates a significant difference between the two groups of snakes. (1 cm H<sub>2</sub>O=0.098 kPa.)

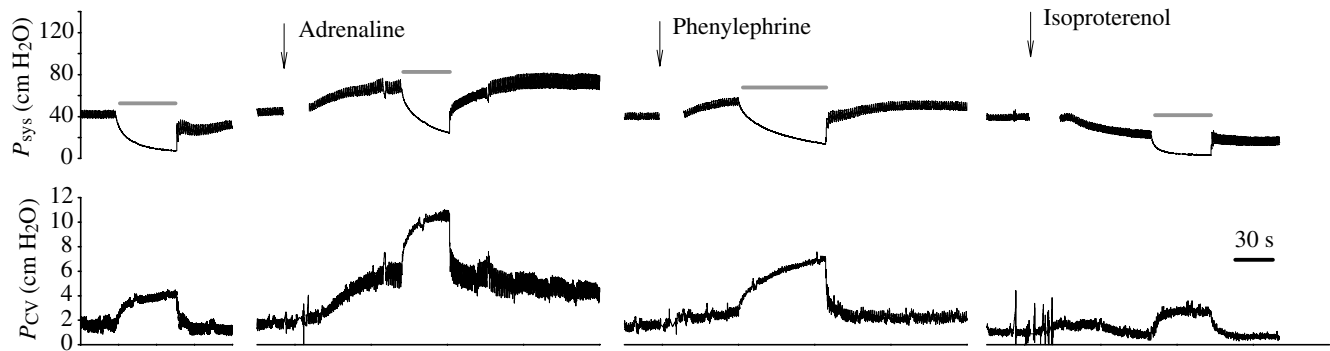

Fig. 7. Haemodynamic parameters in a recovered South American rattlesnake *Crotalus durissus* (550 g), before and after injection of adrenaline ( $10 \mu\text{g kg}^{-1}$ ), phenylephrine ( $10 \mu\text{g kg}^{-1}$ ) and isoproterenol ( $10 \mu\text{g kg}^{-1}$ ). Arrows indicate injection of the various drugs. Grey bars indicate occlusion of blood flow from the heart to measure MCFP.  $P_{\text{sys}}$ , mean systemic blood pressure;  $P_{\text{CV}}$ , central venous pressure. (1 cm  $\text{H}_2\text{O}$ =0.098 kPa.)

phenylephrine caused large changes in  $P_{\text{sys}}$  but had little effect on  $P_{\text{CV}}$  (Bennett et al., 1984). The smaller response to phenylephrine compared with adrenaline in rattlesnakes could be due to a lower  $\alpha$ -receptor affinity of phenylephrine relative to adrenaline. Generally, isoproterenol elicited opposite responses and was associated with a fall in  $P_{\text{sys}}$ ,  $P_{\text{CV}}$  and MCFP. Therefore, the constriction of the arterial and venous vasculature in response to adrenaline is primarily mediated by  $\alpha$ -adrenergic receptors, which is consistent with previous studies on the arterial vasculature of other reptiles (Nilsson, 1983; Overgaard et al., 2002). Our results clearly show that activation of  $\beta$ -receptors can decrease  $P_{\text{CV}}$  and MCFP through dilatation of the venous system, and  $\beta$ -receptors in the veins may contribute to regulating the venous system in rattlesnakes. Isoproterenol, however, does not significantly affect  $P_{\text{CV}}$  or MCFP in dogs (Rothe et al., 1989).

#### *The pressure gradient for venous return and its effect on stroke volume during adrenergic stimulation*

In untreated anaesthetised snakes, the pressure gradient of venous flow ( $\text{MCFP}-P_{\text{CV}}$ ) was 6.2 cm  $\text{H}_2\text{O}$  and increased to 10.1 cm  $\text{H}_2\text{O}$  after the high dose of adrenaline. Surprisingly,  $V_{\text{S}_{\text{tot}}}$  did not increase in response to the higher pressure gradient for venous return and the higher filling pressure ( $P_{\text{CV}}$ ) but actually tended to decrease from  $2.0 \pm 0.4$  to  $1.6 \pm 0.1 \text{ ml kg}^{-1}$ .  $V_{\text{S}_{\text{tot}}}$ , the difference between end-diastolic and end-systolic volumes, is determined by cardiac filling, contractility and afterload ( $P_{\text{sys}}$ ). Adrenaline is expected to increase contractility, but also increased afterload and could have increased end-systolic volume. The effects of adrenaline on  $V_{\text{S}_{\text{tot}}}$  in rattlesnakes differ from those seen in frogs and turtles, where  $V_{\text{S}_{\text{tot}}}$  increases (S. Warburton, D. C. Jackson, V. T. Bobb and T. Wang, unpublished data). This rise in  $V_{\text{S}_{\text{tot}}}$  in frogs and turtles was ascribed to an increased cardiac filling as MCFP rose after adrenaline. In fish, administration of adrenaline did not significantly affect stroke volume (Zhang et al., 1998).

$V_{\text{S}_{\text{tot}}}$  did not change after phenylephrine or isoproterenol despite an increased and decreased pressure gradient, respectively (Figs 2, 3). Contractility is unlikely to have been

affected by phenylephrine, but, as afterload and  $R_{\text{ven}}$  increased, it seems that the unchanged  $V_{\text{S}_{\text{tot}}}$  after  $\alpha$ -adrenergic stimulation results from a balance between venous constriction and higher afterload. An increase in  $R_{\text{ven}}$  in response to  $\alpha$ -adrenergic stimulation has also been reported for anaesthetised dogs (Imai et al., 1978). In our study, isoproterenol reduced afterload and venous resistance, which would be expected to decrease end-systolic volume and to increase end-diastolic volume, respectively. These effects would be enhanced by  $\beta$ -adrenergic stimulation of contractility. However,  $V_{\text{S}_{\text{tot}}}$  was not affected by isoproterenol in rattlesnakes, which may be due to shorter filling time as  $f_{\text{H}}$  increased. In anaesthetised dogs, administration of isoproterenol and noradrenaline increased venous return by decreasing venous resistance through stimulation of  $\beta$ -receptors (Imai et al., 1978).

The marked effects of the various adrenergic drugs on MCFP and  $R_{\text{ven}}$  in rattlesnakes show that this species has a strong adrenergic regulation of the venous system. This is consistent with previous studies on isolated central veins from the ratsnake, *Elaphe obsoleta*, which contract in response to adrenaline (Conklin et al., 1996). Also, Donald and Lillywhite (1988) showed dense innervation of the central venous vasculature in *Elaphe*. Although an increased venous tone did not increase  $V_{\text{S}}$  in untreated conditions in this species, it is likely that an increased sympathetic activity could exert strong influence on venous return and, therefore, may mediate an increased cardiac output under conditions such as exercise, digestion or increased temperature where metabolism is elevated.

#### *MCFP and blood volume changes in anaesthetised snakes*

Neither  $V_{\text{S}}$  nor  $\dot{Q}$  increased when blood volume was raised, which indicates that end-diastolic volume is maximal at normal blood volume. Furthermore,  $V_{\text{S}}$  may not have been affected because  $P_{\text{CV}}$  increased as much as MCFP during volume loading, so that the pressure gradient for venous flow was virtually unchanged. Decreasing blood volume, on the other hand, markedly reduced  $V_{\text{S}}$ , which correlated with a substantial decrease in MCFP and a much lower pressure gradient for venous flow. Thus, as shown in frogs, turtles and mammals

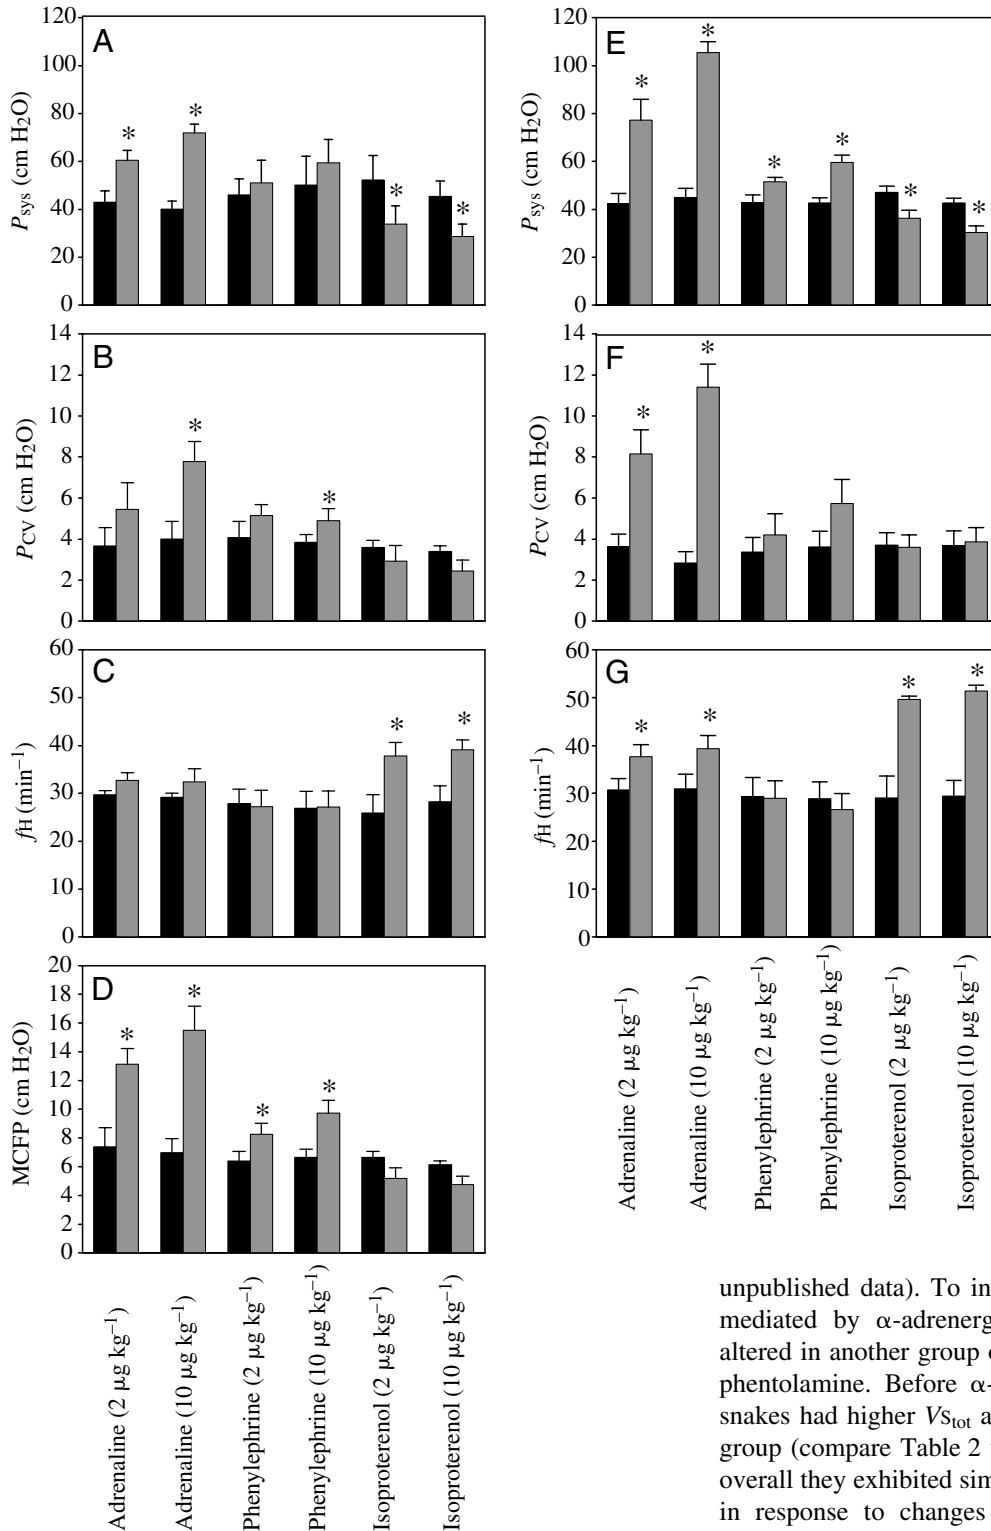

Fig. 8. Effects of bolus injections of adrenaline, phenylephrine and isoproterenol (2 and 10  $\mu\text{g kg}^{-1}$ ) on haemodynamic variables in the recovered South American rattlesnakes *Crotalus durissus*. A–D represent the group with a vascular occluder, and E–G represent the group without a vascular occluder.  $P_{sys}$ , mean systemic blood pressure;  $P_{CV}$ , central venous blood pressure;  $f_H$ , heart rate; MCFP, mean circulatory filling pressure. Black bars represent control values. Grey bars represent values after injection of the various adrenergic agonists. Values are means  $\pm$  S.E.M. ( $N=4$ ) for each group. \* indicates a significant difference relative to control values. (1 cm H<sub>2</sub>O=0.098 kPa.)

(Guyton, 1955; S. Warburton, D. C. Jackson, V. T. Bobb and T. Wang, unpublished data), there is a clear relationship between MCFP and cardiac filling and  $V_s$  in rattlesnakes.

In rattlesnakes, blood withdrawal was accompanied by a rise in  $R_{sys}$ , as previously observed in turtles and frogs (S. Warburton, D. C. Jackson, V. T. Bobb and T. Wang,

unpublished data). To investigate whether this response was mediated by  $\alpha$ -adrenergic stimulation, blood volume was altered in another group of snakes following  $\alpha$ -blockade with phentolamine. Before  $\alpha$ -adrenergic blockade, this group of snakes had higher  $V_{S_{tot}}$  and  $\dot{Q}_{tot}$  compared with the untreated group (compare Table 2 with values given in Fig. 3A,D), but overall they exhibited similar changes in  $P_{CV}$ , MCFP and  $V_{S_{tot}}$  in response to changes in blood volume (Figs 4, 5B, 6C). However, the rise in  $R_{sys}$  in response to volume depletion was fully abolished after  $\alpha$ -adrenergic blockade, suggesting an increased sympathetic tone in response to lowered blood pressure and volume.

#### Compliance and unstressed blood volume

The measurements of MCFP at the various blood volumes also allow for an estimation of unstressed blood volume

(USBV), vascular compliance ( $C$ ) and stressed blood volume (SBV) as the difference between total blood volume and USBV. In doing so, we assumed that there was no net fluid movement across the capillary wall during blood volume changes and we used the total blood volume of  $54 \text{ ml kg}^{-1}$ , which has been determined in *Crotalus viridis* (Smits and Lillywhite, 1984). Blood was infused and withdrawn as fast as possible, leaving the animals hypo- and hypervolemic for as short a time as possible, and MCFP was always measured immediately after blood volume alteration to avoid compensatory responses.

USBV is the volume required to fill the circulatory system until a transmural pressure of zero and is accordingly considered to be haemodynamically inactive, whereas SBV is haemodynamically active (Pang, 2000, 2001). USBV is determined by the capacity and activity of the smooth muscle cells surrounding the blood vessels, and an increased vascular tone translocates blood from USBV to SBV (Pang, 2001). We estimated USBV to be  $20.7 \pm 1.8 \text{ ml kg}^{-1}$  and  $18.3 \pm 7.1 \text{ ml kg}^{-1}$  for the untreated and  $\alpha$ -blocked snakes, respectively. Compliance is a measure of vascular elasticity and is defined as a change in volume relative to a change in transmural pressure (Rothe, 1993; Pang, 2001). In rattlesnakes,  $C$  was estimated to be  $3.3 \pm 0.3 \text{ ml kg}^{-1} \text{ cmHg}^{-1}$  for the untreated snakes and  $3.9 \pm 0.7 \text{ ml kg}^{-1} \text{ cmHg}^{-1}$  for the  $\alpha$ -blocked snakes. These estimates are similar to those determined in trout and two species of anurans (*Bufo marinus* and *Rana catesbeiana*). In recovered trout, USBV and  $C$  are  $18.3 \pm 0.7 \text{ ml kg}^{-1}$  and  $3.0 \pm 0.2 \text{ ml kg}^{-1} \text{ mmHg}^{-1}$ , respectively (Zhang et al., 1998), and another study determined  $C$  in trout to be  $2.8 \pm 0.3 \text{ ml kg}^{-1} \text{ mmHg}^{-1}$  (Minerick et al., 2003). In recovered *Bufo*, USBV and  $C$  are  $2.5 \text{ ml kg}^{-1}$  and  $3.7 \text{ ml kg}^{-1} \text{ mmHg}^{-1}$ , and in recovered *Rana*, USBV and  $C$  are  $14.2 \text{ ml kg}^{-1}$  and  $2.2 \text{ ml kg}^{-1} \text{ mmHg}^{-1}$ , respectively (Hoagland, 1997).

Neither compliance nor unstressed volume were significantly affected by  $\alpha$ -blockade in rattlesnakes. Similarly, compliance and unstressed volume were not affected by phentolamine in trout, but there were small rises in both parameters after infusion of another  $\alpha$ -antagonist, prazosin (Zhang et al., 1998).

#### *The effect of NO on the venous system*

To investigate the role of nitric oxide (NO) on the venous circulation, the NO donor SNP was injected. It is well established that SNP reduces systemic resistance in reptiles (Crossley et al., 2000; Galli et al., 2005a; Skovgaard et al., in press) and dilates central veins from *Elaphe in vitro* (Conklin et al., 1996). The effect of NO on the venous circulation of reptiles, however, has not been investigated *in vivo*. In rattlesnakes, SNP decreased  $P_{\text{sys}}$ ,  $R_{\text{sys}}$  and  $V_{\text{stot}}$  as previously shown in this species (Galli et al., 2005a) and caused marked decreases in  $P_{\text{CV}}$  and MCFP, which indicate that NO has a marked effect on the veins in this species. In trout, injection of SNP had no effect on either  $P_{\text{CV}}$  or  $V_{\text{s}}$  and only slightly decreased MCFP (Olson et al., 1997), whereas in toads, SNP caused dilatation of the central veins (Broughton and Donald,

2005). In rattlesnakes, MCFP decreased proportionally more than  $P_{\text{CV}}$ , which led to a decreased venous return, reflected in a significant decreased total  $V_{\text{s}}$  when the low dose of SNP was injected.

#### Summary

Adrenaline, phenylephrine and isoproterenol significantly affected venous tone, reflected as a change in MCFP, in both anaesthetised and fully recovered rattlesnakes. Since phenylephrine showed similar responses as adrenaline, we conclude that sympathetic responses are mediated through  $\alpha$ -receptors in rattlesnakes. Stimulation of  $\beta$ -receptors with isoproterenol decreased venous tone. Since SNP decreased  $P_{\text{CV}}$  and MCFP, nitric oxide seems to regulate venous tone in anaesthetised snakes. When venous return was increased by elevating blood volume, there was only a small rise in  $V_{\text{s}}$ , which indicates that end-diastolic volume is maximal during normal conditions. However, venous return clearly affected  $V_{\text{s}}$  when MCFP was reduced through volume depletion. Since blocking  $\alpha$ -receptors with phentolamine did not markedly affect MCFP, USBV or  $C$ , rattlesnake did not appear to have a significant  $\alpha$ -adrenergic tone during resting conditions.

This study was supported by the Danish Research Council and FAPESP.

#### References

- Bennett, T. D., Wyss, C. R. and Scher, A. M. (1984). Changes in vascular capacity in awake dogs in response to carotid sinus occlusion and administration of catecholamines. *Circ. Res.* **55**, 440-453.
- Bishop, V. S., Stone, H. L. and Guyton, A. C. (1964). Cardiac function curves in conscious dogs. *Am. J. Physiol.* **207**, 677-682.
- Broughton, B. R. S. and Donald, J. A. (2005). Nitric oxide control of large veins in the toad, *Bufo marinus*. *J. Comp. Physiol. B* **175**, 157-166.
- Clark, T. D., Wang, T., Butler, P. J. and Frappell, P. B. (2005). Factorial scopes of cardio-metabolic variables in the varanid lizard, *Varanus rosenbergi*. *Am. J. Physiol.* **288**, R992-R997.
- Conklin, D. J., Lillywhite, H. B., Olson, K. R., Ballard, R. E. and Hargens, A. R. (1996). Blood vessel adaptation to gravity in a semi-arboreal snake. *J. Comp. Physiol.* **165**, 518-526.
- Crossley, D., Altimiras, J. and Wang, T. (1998). Hypoxia elicits an increase in pulmonary vascular resistance of anesthetized turtles (*Tracemys scripta*). *J. Exp. Biol.* **201**, 3367-3375.
- Crossley, D. A., Wang, T. and Altimiras, J. (2000). Role of nitric oxide in the systemic and pulmonary circulation of anesthetized turtles (*Tracemys scripta*). *J. Exp. Zool.* **286**, 683-689.
- Donald, J. A. and Lillywhite, H. B. (1988). Adrenergic innervation of the large arteries and veins of the semi-arboreal snake *Elaphe obsoleta*. *J. Morphol.* **198**, 25-31.
- Farmer, C. G. and Hicks, J. W. (2000). Circulatory impairment induced by exercise in the lizard *Iguana iguana*. *J. Exp. Biol.* **203**, 2691-2697.
- Galli, G. L. J., Skovgaard, N., Abe, A. S. E., Taylor, E. W. and Wang, T. (2005a). The role of nitric oxide in the regulation of the systemic and pulmonary vasculature of the rattlesnake, *Crotalus durissus terrificus*. *J. Comp. Physiol. B* **175**, 201-205.
- Galli, G. L. J., Skovgaard, N., Abe, A. S. E., Taylor, E. W., Conlon, J. M. and Wang, T. (2005b). Cardiovascular actions of rattlesnake bradykinin (Val<sup>1</sup>, Thr<sup>6</sup> bradykinin) in the anesthetized south American rattlesnake, *Crotalus durissus terrificus*. *Am. J. Physiol.* **288**, 456-465.
- Gleeson, T. T., Mitchell, G. S. and Bennet, A. F. (1980). Cardiovascular responses to graded activity in the lizards *Varanus* and *Iguana*. *Am. J. Physiol.* **239**, R174-R179.
- Guyton, A. C. (1955). Determination of cardiac output by equating venous return curves with cardiac response curves. *Physiol. Rev.* **35**, 123-129.

- Guyton, A. C.** (1963). *Circulatory Physiology: Cardiac Output and its Regulation*. Philadelphia: W. B. Saunders Company.
- Guyton, A. C., Satterfield, J. H. and Harris, J. W.** (1952). Dynamics of central venous resistance with observations on static blood pressure. *Am. J. Physiol.* **169**, 691-699.
- Guyton, A. C., Polizo, D. and Armstrong, G. G.** (1954). Mean circulatory filling pressure measured immediately after cessation of heart pumping. *Am. J. Physiol.* **179**, 261-267.
- Guyton, A. C., Lindsey, A. W. and Kaufmann, B. N.** (1955). Effect of mean circulatory filling pressure and other peripheral circulatory factors on cardiac output. *Am. J. Physiol.* **180**, 463-468.
- Guyton, A. C., Lindsey, A. W., Abernathy, B. and Richardson, T.** (1957). Venous return at various right atrial pressures and the normal venous return curve. *Am. J. Physiol.* **189**, 609-615.
- Hainsworth, R.** (1986). Vascular capacitance: Its control and importance. *Rev. Physiol. Biochem. Pharmacol.* **105**, 101-173.
- Hicks, J. W., Wang, T. and Bennett, A. F.** (2000). Patterns of cardiovascular and ventilatory response to elevated metabolic states in the lizard, *Varanus exanthematicus*. *J. Exp. Biol.* **203**, 2437-2445.
- Hoagland, T. M.** (1997). Whole body in vivo compliance in two amphibians, *Bufo marinus* and *Rana catesbeiana*. Masters Thesis, Portland State University, Oregon, USA.
- Imai, Y., Saton, K. and Taira, N.** (1978). Role of the peripheral vasculature in changes in venous return caused by isoproterenol, norepinephrine, and methowamine in anesthetized dogs. *Circ. Res.* **43**, 553-556.
- Minerick, A. R., Chang, H., Hoagland, T. M. and Olsen, K. R.** (2003). Dynamic synchronization analysis of venous pressure-driven cardiac output in rainbow trout. *Am. J. Physiol.* **285**, R889-R896.
- Munns, S. L., Hartzler, L. K., Bennett, A. F. and Hicks, J. W.** (2004). Elevated intra-abdominal pressure limits venous return during exercise in *Varanus exanthematicus*. *J. Exp. Biol.* **207**, 4111-4120.
- Nilsson, S.** (1983). *Autonomic Nerve Function in the Vertebrates. Zoophysiology Series*. Berlin: Springer Verlag.
- Olson, K. R., Conklin, D. J., Farrell, A. P., Keen, J. E., Takei, Y., Weaver, L., Smith, M. P. and Zhang, Y.** (1997). Effects of natriuretic peptides and nitroprusside on venous function in trout. *Am. J. Physiol.* **271**, R527-R539.
- Overgaard, J., Stecyk, J. A. W., Farrrel, A. P. and Wang, T.** (2002). Adrenergic control of the cardiovascular system in the turtle *Tracemys scripta*. *J. Exp. Biol.* **205**, 3335-3345.
- Pang, C. Y.** (2000). Measurements of body venous tone. *J. Pharmacol. Toxicol. Methods* **44**, 341-360.
- Pang, C. Y.** (2001). Autonomic control of the venous system in health and disease effects of drugs. *Pharmacol. Ther.* **90**, 179-230.
- Rothe, C. F.** (1986). Physiology of venous return. *Arch. Intern. Med.* **146**, 977-982.
- Rothe, C. F.** (1993). Mean circulatory filling pressure: its meaning and measurement. *J. Appl. Physiol.* **74**, 499-509.
- Rothe, C. F. and Dress, J. A.** (1976). Vascular capacitance and fluid shifts in dogs during prolonged hemorrhagic hypotension. *Circ. Res.* **38**, 347-356.
- Rothe, C. F., Flanagan, A. D. and Maass-Moreno, R.** (1989). Role of  $\beta$ -adrenergic agonists in the control of vascular capacitance. *Can. J. Physiol. Pharmacol.* **68**, 575-585.
- Samar, R. E. and Coleman, T. G.** (1978). Measurements of mean circulatory filling pressure and vascular capacitance in the rat. *Am. J. Physiol.* **234**, H94-H100.
- Sandblom, E. and Axelsson, M.** (2005). Baroreflex mediated control of heart rate and vascular capacitance in trout. *J. Exp. Biol.* **208**, 821-829.
- Secor, S. M., Hicks, J. W. and Bennett, A. F.** (2000). Ventilatory and cardiovascular responses of a python (*Python molurus*) to exercise and digestion. *J. Exp. Biol.* **203**, 2447-2454.
- Skovgaard, N., Galli, G., Abe, A. S., Taylor, E. W. and Wang, T.** (in press). The role of nitric oxide in regulation of the cardiovascular system in reptiles. *Comp. Biochem. Physiol.*, in press.
- Smits, A. W. and Lillywhite, H. B.** (1984). Maintenance of blood volume in snakes: transcapillary shifts of extravascular fluids during acute hemorrhage. *J. Comp. Physiol. B.* **155**, 305-310.
- Stinner, J. N.** (1987). Cardiovascular and metabolic responses to temperature in *Coluber constrictor*. *Am. J. Physiol.* **253**, 222-227.
- Tabrizchi, R. and Pang, C.** (1992). Effects of drugs on body venous tone, as reflected by mean circulatory filling pressure. *Cardiovasc. Res.* **26**, 443-448.
- Trippodo, N. C.** (1981). Total circulatory capacity in the rat. Effects of epinephrine and vasopressin on compliance and unstressed volume. *Circ. Res.* **49**, 923-931.
- Wang, T., Fernandes, W. and Abe, A. S.** (1993). Blood pH and O<sub>2</sub> homeostasis upon CO<sub>2</sub> anesthesia in the rattlesnake (*Crotalus durissus*). *Snake* **25**, 21-26.
- Wang, T., Carrier, D. R. and Hicks, J. W.** (1997). Ventilation and gas exchange in lizards during treadmill exercise. *J. Exp. Biol.* **200**, 2629-2639.
- Wang, T., Taylor, E. W., Andrade, D. and Abe, A. S.** (2001). Autonomic control of heart rate during forced activity and digestion in the snake *Boa constrictor*. *J. Exp. Biol.* **204**, 3553-3560.
- Zhang, Y., Weaver, L., Ibeawuchi, A. and Olson, K. R.** (1998). Catecholaminergic regulation of venous function in the rainbow trout. *Am. J. Physiol.* **43**, R1195-R1202.
